# Supplementary material
Source: PubMed Central journal article supplement (PMC2662712)
Supplement: NIHMS81505-supplement-01.pdf [file NIHMS81505-supplement-01.pdf]

Supporting Information for

# Poly(ADP-ribose) Polymerase-1 Activity Stimulates the Dissociation of Nuclear Proteins from Platinum- Damaged DNA

*Evan R. Guggenheim, Alison E. Ondrus, Mohammad Movassaghi\*, Stephen J. Lippard\**

*Department of Chemistry, Massachusetts Institute of Technology,  
Cambridge, Massachusetts 02139-4307*

**Scheme S.1.** Synthesis of CEP-A (**A**) and CEP-6800 (**B**).

**Table S.1.** The cytotoxicity of three PARP inhibitors as tested by MTT assays in each of four cancer cell lines.

**Figure S.1.** The cytotoxicity of three PARP inhibitors was tested by the MTT assay in each of four cancer cell lines. HeLa (◆), NTera2 (■), BxPC3 (▲), and U2OS (✕) cells are evaluated. The PARP inhibitors used are 4-ANI (**C**), CEP-A (**A**), and CEP-6800 (**B**). The maximum tolerated dose value results are summarized in Table S.1.

**Table S.1:** Maximum tolerated dose of three PARP inhibitors in four cancer cell lines

| Cell line | 4-ANI ( $\mu\text{M}$ ) | CEP-A ( $\mu\text{M}$ ) | CEP-6800 ( $\mu\text{M}$ ) |
|-----------|-------------------------|-------------------------|----------------------------|
| HeLa      | 2.0                     | 0.1                     | 3.0                        |
| NTera2    | 0.1                     | 0.1                     | 0.1                        |
| BxPC3     | 2.0                     | 0.1                     | 3.0                        |
| U2OS      | 1.0                     | 0.1                     | 1.0                        |
